# Supplementary material
Source: MDPI journal article supplement (https://www.mdpi.com/2079-6412/11/8/884)
Supplement: s1 [file s1 › coatings-1301264-supplementary.pdf]

## SUPPLEMENTARY INFORMATION

# Compositional and morphological comparison among three coeval violins made by Giuseppe Guarneri “del Gesù” in 1734

Giacomo Fiocco <sup>1,2</sup>, Sebastian Gonzalez <sup>3</sup>, Claudia Invernizzi <sup>1</sup>, Tommaso Rovetta <sup>1</sup>, Michela Albano <sup>1,4</sup>, Piercarlo Dondi <sup>5</sup>, Maurizio Licchelli <sup>1,6</sup>, Fabio Antonacci <sup>3</sup> and Marco Malagodi <sup>1,7,\*</sup>

<sup>1</sup> Arvedi Laboratory of Non-Invasive Diagnostics, CISRiC, University of Pavia, 26100 Cremona, Italy; giacomo.fiocco@unipv.it (G.F.); claudia.invernizzi@unipv.it (C.I.); tommaso.rovetta@unipv.it (T.R.); michela.albano@unipv.it (M.A.); maurizio.licchelli@unipv.it (M.L.); marco.malagodi@unipv.it (M.M.)

<sup>2</sup> Department of Chemistry, University of Torino, 10125 Torino, Italy

<sup>3</sup> Polytechnic of Milan, DEIB, Cremona Campus, Musical Acoustics Lab at the Museo del Violino of Cremona, 20133 Milano, Italy; juanesebastian.gonzalez@polimi.it (S.G.); fabio.antonacci@polimi.it (F.A.)

<sup>4</sup> Department of Physics, Polytechnic of Milan, 20133 Milano, Italy

<sup>5</sup> Department of Electrical, Computer and Biomedical Engineering, University of Pavia, 27100 Pavia, Italy; piercarlo.dondi@unipv.it

<sup>6</sup> Department of Chemistry, University of Pavia, 27100 Pavia, Italy

<sup>7</sup> Department of Musicology and Cultural Heritage, University of Pavia, 26100 Cremona, Italy

\* Correspondence: marco.malagodi@unipv.it; Tel.: +39-349-644-5217

## TABLE OF CONTENTS

- Figure S1: visible (left) and UV (right) images of the backplate of the violins
- Figure S2: UV Analyzer images of the soundboard of the violins
- Figure S3: legend of the measurements position acquired on the violins
- Table S1: measurements obtained on the 3D model of the violins

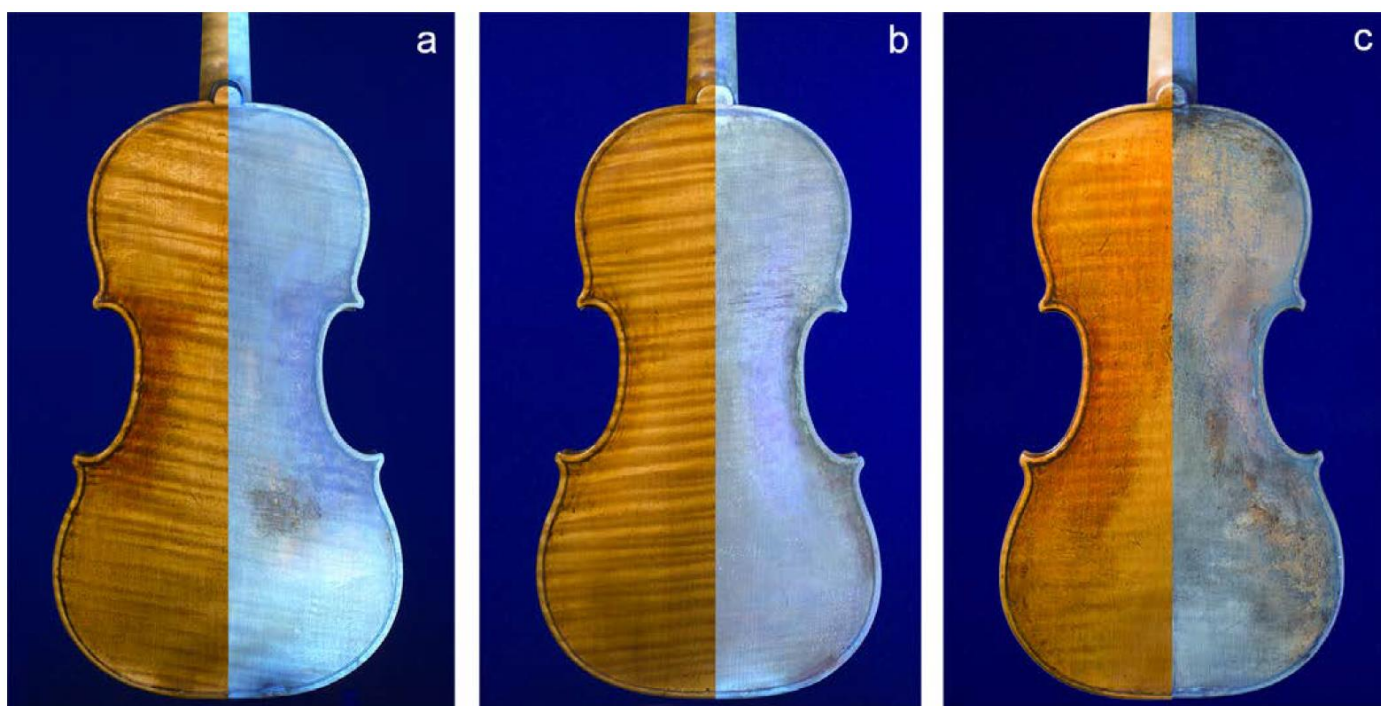

**Figure S1.** Visible (left) and UV (right) images of the backplate of the Spagnoletti (a), Stauffer (b), and Principe Doria (c) made by Giuseppe Guarneri del Gesù in 1734.

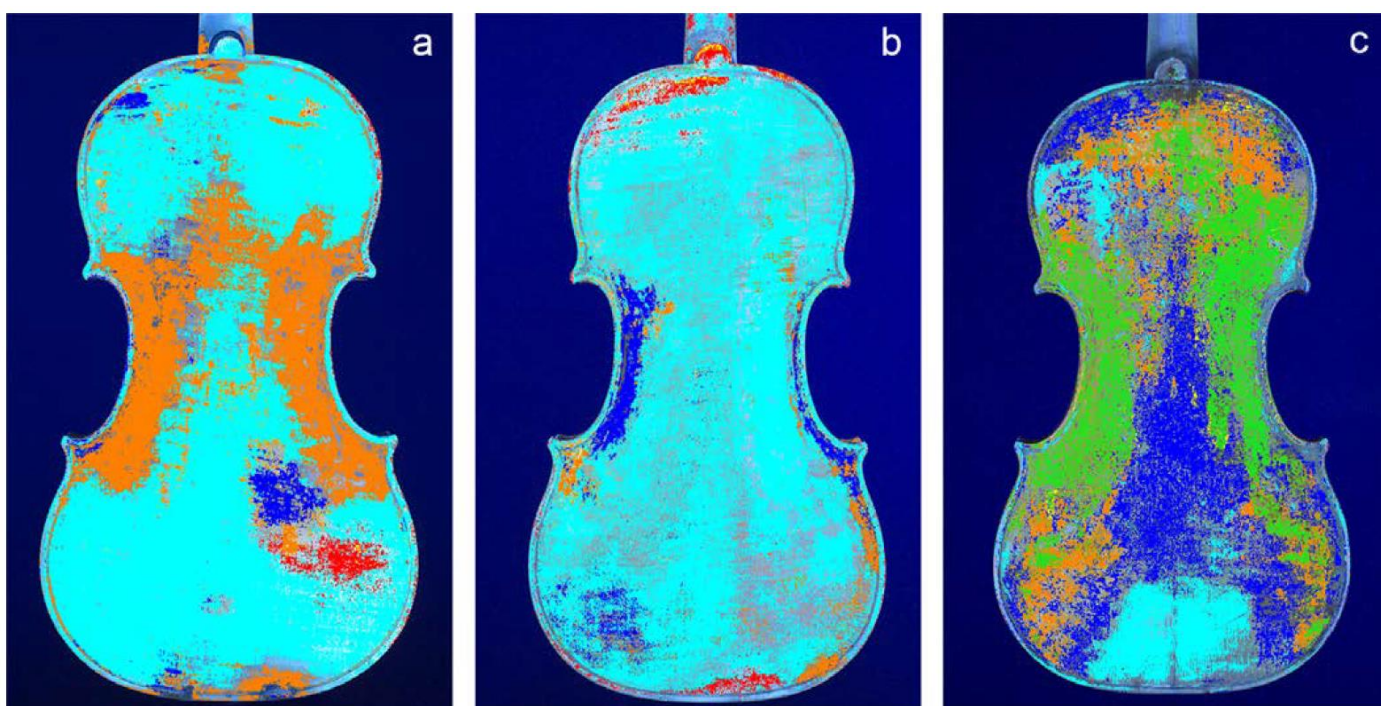

**Figure S2.** Images of the soundboard of the Spagnoletti (a), Stauffer (b), and Principe Doria (c) violins obtained through UV Analyzer. Different colors correspond to best-conserved (orange), worn-out (light blue), and restoration (red, blue, and green) areas, according to their different UV fluorescence levels.

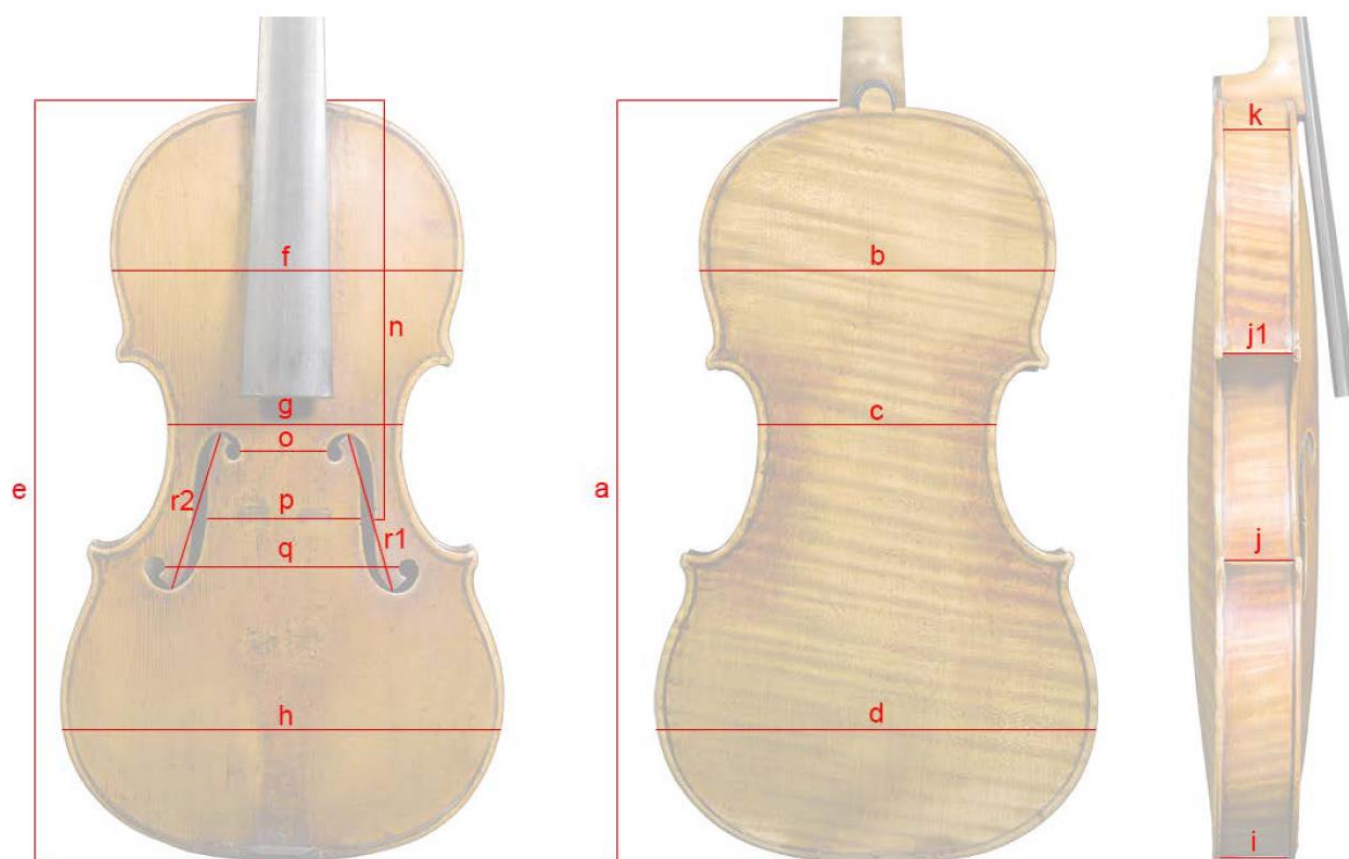

**Figure S3.** Legend of the measurement positions acquired on the violins.

**Table S1.** Measurements obtained on the 3D models of the three violins. Measurement letters in the first column are related to the measurement positions shown in Figure S3.

| Measure | Spagnoletti (mm) | Stauffer (mm) | Principe Doria (mm) |
|---------|------------------|---------------|---------------------|
| a       | 349.50           | 349.37        | 349.95              |
| b       | 164.05           | 160.67        | 163.97              |
| c       | 108.19           | 106.41        | 105.48              |
| d       | 203.63           | 201.32        | 201.85              |
| e       | 349.38           | 348.81        | 348.82              |
| f       | 162.38           | 161.76        | 166.02              |
| g       | 107.14           | 107.23        | 107.19              |
| h       | 203.42           | 200.16        | 203.66              |
| i       | 31.17            | 29.33         | 29.50               |
| j       | 30.51            | 30.01         | 29.91               |
| j1      | 30.44            | 29.58         | 29.14               |
| k       | 30.35            | 28.85         | 27.73               |
| n       | 195.27           | 193.08        | 192.79              |
| o       | 38.77            | 38.27         | 38.96               |
| p       | 69.34            | 68.66         | 69.53               |
| q       | 107.21           | 107.30        | 109.02              |
| r1      | 76.53            | 77.05         | 74.59               |
| r2      | 76.82            | 76.53         | 75.41               |
